P5285

## Pressure-volume relationship by cardiovascular magnetic resonance: feasibility and clinical implications

A. De Luca<sup>1</sup>, A. Meloni<sup>2</sup>, C. Nugara<sup>3</sup>, C. Cappelletto<sup>1</sup>, G. Aquaro<sup>2</sup>, C. Grigoratos<sup>2</sup>, G. Todiere<sup>2</sup>, A. Barison<sup>2</sup>, G. Novo<sup>3</sup>, G. Sinagra<sup>1</sup>, A. Pepe<sup>2</sup>

<sup>1</sup>University of Trieste, Trieste, Italy; <sup>2</sup>Fondazione Toscana Gabriele Monasterio, Pisa, Italy; <sup>3</sup>University of Palermo, Palermo, Italy

**Background:** The variation between rest and peak stress end-systolic pressure-volume relation (ESPVR; the Suga index) is easily obtained during routine stress echocardiography and has been established as a reasonably load-independent index of myocardial contractile performance that provides prognostic information above and beyond regional wall motion.

**Purpose:** This is the first study assessing the delta rest-stress ESPVR (DESPVR) by stress Cardiovascular Magnetic Resonance (CMR).

**Methods:** Eighty-five consecutive patients (19 females, main age  $62.99 \pm 9.26$  years) who underwent dipyridamole stress-CMR in a high volume CMR Laboratory were considered. The ESPVR was evaluated at rest and peak stress from raw measurement of systolic arterial pressure by cuff sphygmomanometer and end-systolic volume by biplane Simpson method.

**Results:** Mean ESPVR index at rest and peak stress was, respectively,  $4.52 \pm 2.26$  mmHg/mL/m<sup>2</sup> and  $4.62 \pm 2.32$  mmHg/mL/m<sup>2</sup> and mean DESPVR was  $0.11 \pm 1.19$  mmHg/mL/m<sup>2</sup>.

DESPVR was not associated to age or sex.

An inverse relationship between rest left ventricular end-diastolic volume

index (LVEDVI) and both rest and peak ESPVR was present ( $R = -0.805$   $P < 0.0001$  and  $R = -0.795$   $P < 0.0001$ , respectively), but it was absent when the DESPVR was considered ( $R = 0.170$   $P = 0.121$ ).

An abnormal stress CMR was found in 22 patients and the DESPVR was comparable between patients with normal and abnormal stress exam.

During a median follow-up of 60.62 months (IQ range 36.78 months), 27 cardiovascular events occurred: 3 deaths, 1 ventricular arrhythmias, 9 coronary syndromes, 14 heart failure hospitalization. At receiver-operating characteristic (ROC) curve analysis, a DESPVR  $< 0.009$  predicted the presence of future cardiac events with a sensitivity of 0.70 and a specificity of 0.64 ( $P = 0.049$ ).

**Conclusions:** We showed for the first time that dipyridamole stress CMR can be used for the assessment of DESPVR. DESPVR was shown to be independent from chamber size and, as a consequence, can be used for a comparative assessment of patients with different diseases. DESPVR by CMR can provide a prognostic stratification and the optimal cutoff for relevant events was 0.009.
